# Supplementary material for: An etched nanoporous Ge anode in a novel metal–air energy conversion cell
Source: Royal Society of Chemistry journal article supplement (doi:10.1039/c3cp50885d), 2013-01-01
Supplement: c3cp50885d.pdf [file c3cp50885d.pdf]

## Supplementary Information

**Table S1. Theoretical electrochemical equivalents of selected metal-air materials**

| Material  | Density (g/cm <sup>3</sup> ) | Electrochem. Equiv.<br>(Ah/cm <sup>3</sup> ) | Energy Density (kWh/L) | Specific Energy<br>(kWh/kg) |
|-----------|------------------------------|----------------------------------------------|------------------------|-----------------------------|
| Carbon    | 2.27                         | 20.26                                        | 20.67                  | 9.1                         |
| Silicon   | 2.33                         | 8.89                                         | 14.23                  | 6.11                        |
| Germanium | 5.32                         | 7.85                                         | 7.85                   | 1.48                        |
| Zinc      | 7.1                          | 5.82                                         | 9.31                   | 1.31                        |
| Lithium   | 0.53                         | 2.05                                         | 6.96                   | 13.13                       |

Condition: 20 C and 1 atm

\* Free Energy:  $\Delta G^\circ = -nFE^\circ$

\*\* Theoretical Capacity (Coulombic)

: Theoretically 1 gram-equivalent weight of material will deliver **96,487 C or 26.8 Ah**  
(Faraday).

(A gram-equivalent weight is the atomic weight of the active material in grams divided  
by the number of electrons involved in the reaction.)

\*\*\* Based on active anode (fuel electrode) only (O<sub>2</sub> not included),

**Reference:**

Linden, TB Reddy, Handbook of Batteries, 4th ed., McGraw- Hill, New York, 2010

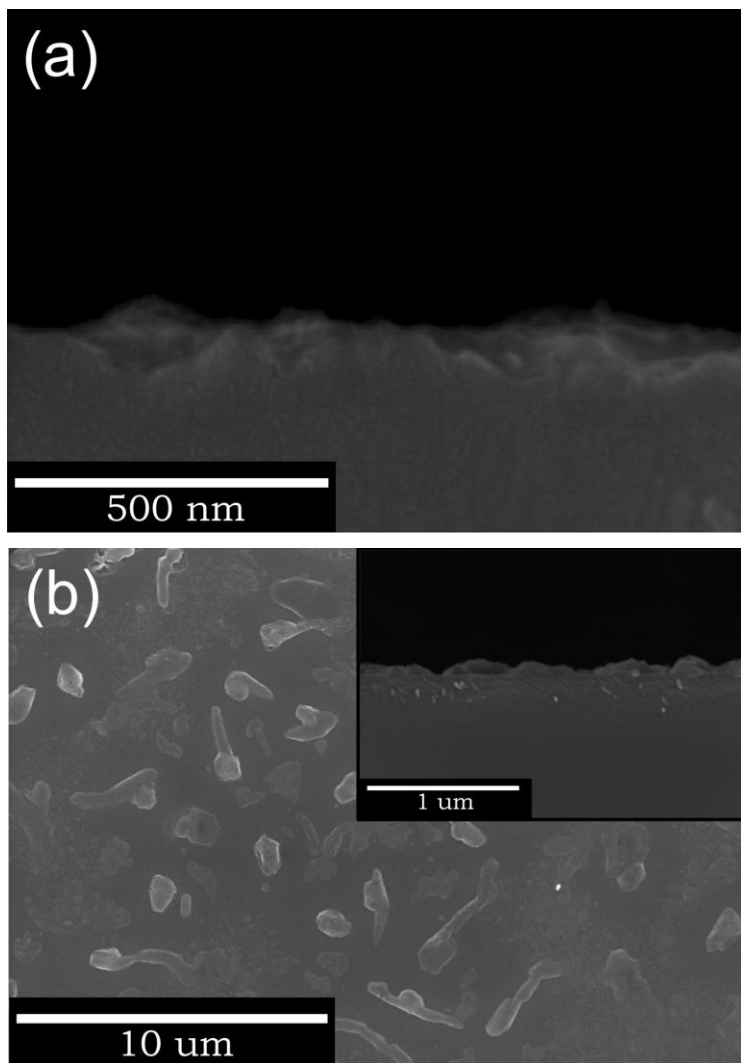

**Fig. S1** (a) Cross-section SEM image of PGe showing non-uniform surface (40 wt. % HF, 1 mA/cm<sup>2</sup>, 3 hr) and (b) Plain and cross-section SEM images of a highly electropolished Ge (5 wt. % HF, 100.0 mA/cm<sup>2</sup>, 24 hr).

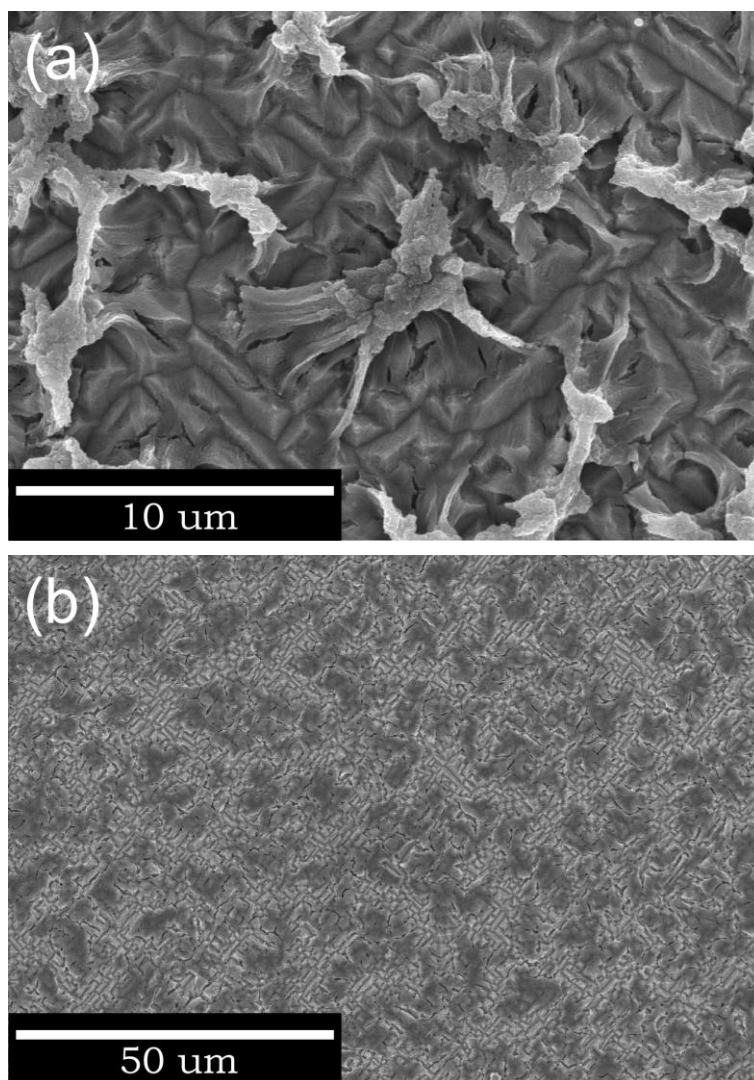

**Fig. S2** SEM images of other porous Ge structures that can be formed in different etching conditions,  
(a) 48 wt. %, 0.5 mA/cm<sup>2</sup>, 24 hr and (b) 40 wt. % HF, 0.5 mA/cm<sup>2</sup>, 24 hr.

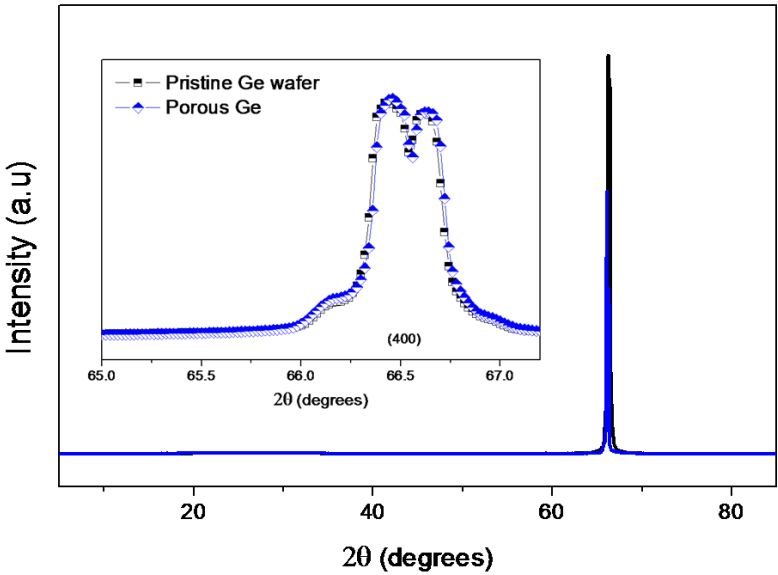

**Fig. S3** X-ray diffractograms of pristine and etched Ge wafers.

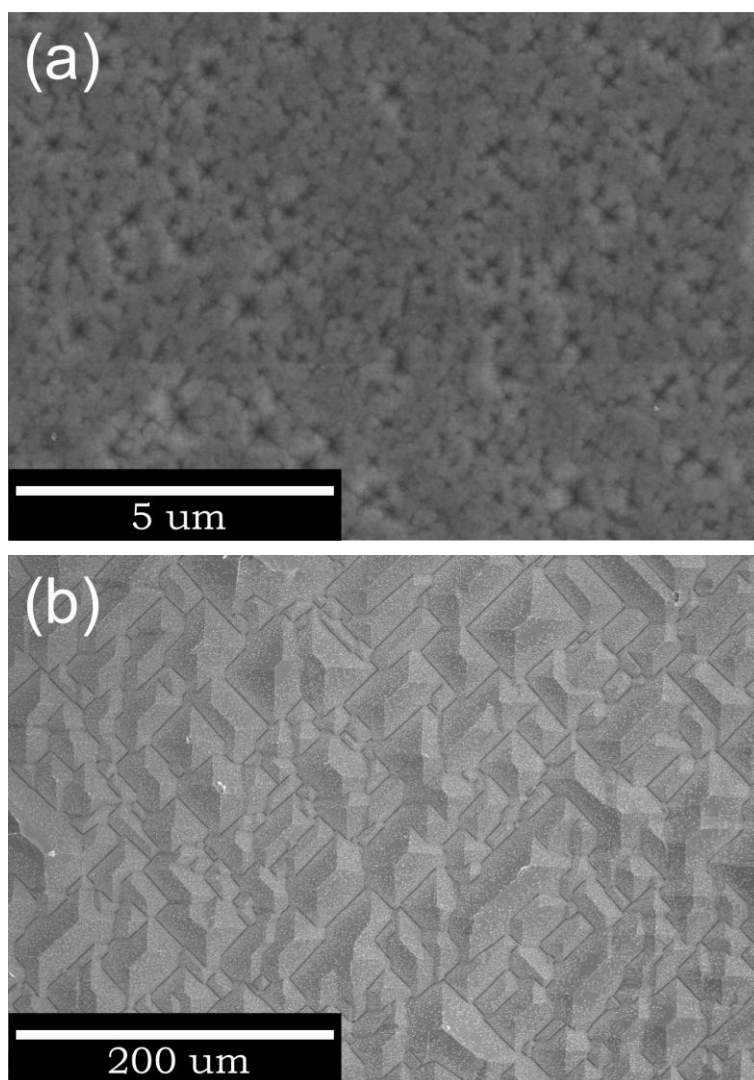

**Fig. S4** Post-galvanostatic discharge SEM images of the ordered PGe structures,  
(a) EE-PGe and (b) EE-ELE-PGe

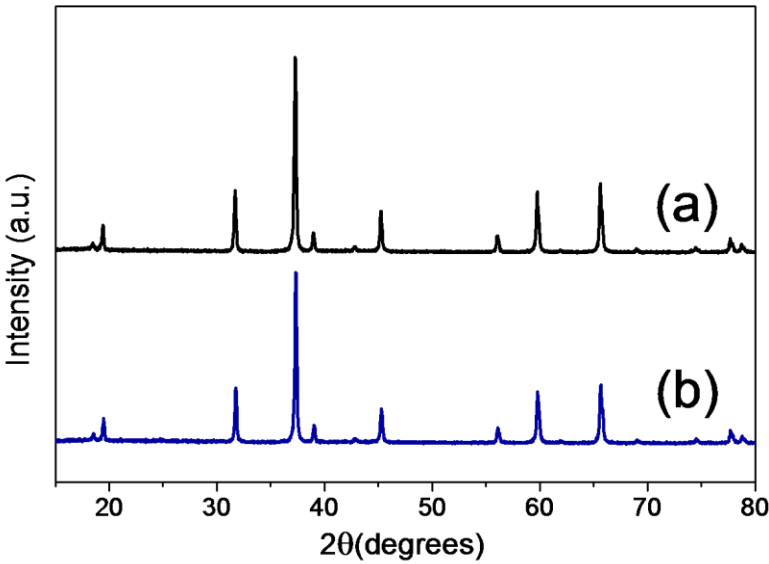

**Fig. S5** X-ray diffractograms of the gas diffusion electrode used in the Ge-air cell (a) before and (b) after the discharge.
